# Supplementary material
Source: PubMed Central journal article supplement (PMC139975)
Supplement: 1471-2105-3-30-S1.pdf [file 1471-2105-3-30-S1.pdf]

**File 1: Regulatory modules from the literature.** Coordinates (in basepairs) are based on genomic data from Release 2 (see Materials and Methods). Modules whose annotated binding sites were used to construct weight matrices are marked by a star. The spacing between modules and transcription start is reported as spacer. The +/- signs of spacing and length refer to the chromosomal orientation of the minimal distance (spacer) and maximal distance (length) of the module to transcription start. The signs are only different if the module overlaps transcription start.

| Gene               | Chrom. | Transcript start | Module          | Spacer | Length | Reference |
|--------------------|--------|------------------|-----------------|--------|--------|-----------|
| even-skipped       | 2R     | 5008231 +        | Stripes 3-7 *   | -3230  | -510   | (1)       |
| even-skipped       | 2R     | 5008231 +        | Stripe 2 *      | -859   | -670   | (1)       |
| even-skipped       | 2R     | 5008231 +        | Stripes 4-6     | 4658   | 601    | (2)       |
| even-skipped       | 2R     | 5008231 +        | Stripe 5        | 7401   | 799    | (2)       |
| giant              | X      | 2177529 -        |                 | 1815   | 944    | (2)       |
| hairy              | 3L     | 8596386 +        | Stripe 7        | -10095 | -931   | (1)       |
| hairy              | 3L     | 8596386 +        | Stripe 6 *      | -8708  | -546   | (1)       |
| hairy              | 3L     | 8596386 +        | Stripe 5 *      | -5723  | -301   | (1)       |
| hairy              | 3L     | 8596386 +        | Stripe 1        | -4302  | -1157  | (1)       |
| hairy              | 3L     | 8596386 +        | Stripes 3-4     | -10828 | -1743  | (1)       |
| hunchback          | 3R     | 4510876 -        | Anterior *      | -2471  | -720   | (1)       |
| hunchback          | 3R     | 4510876 -        | Posterior *     | 3006   | 1022   | (1)       |
| knirps             | 3L     | 20543461 -       |                 | -20    | 1576   | (1)       |
| knirps             | 3L     | 20543461 -       | Kni64-Element * | 1986   | 66     | (1)       |
| Kruppel            | 2R     | 20189149 +       | Kr730 *         | -3612  | -721   | (1)       |
| Kruppel            | 2R     | 20189149 +       | CD2             | 1191   | -1706  | (1)       |
| rhomboid           | 3L     | 1442943 +        | Neuroectoderm * | -1759  | -191   | (3)       |
| runt               | X      | 20317598 +       | Stripe 3        | -8885  | -2403  | (2)       |
| runt               | X      | 20317598 +       | Stripe 5        | -11520 | -1334  | (2)       |
| spalt major        | 2L     | 11342907 -       | Early Enhancer  | 10459  | 515    | (2)       |
| snail              | 2L     | 15362988 -       |                 | 1094   | 799    | (4)       |
| short gastrulation | X      | 15368706 -       |                 | -698   | -274   | (5)       |
| tailless           | 3R     | 26559162 +       |                 | -876   | -382   | (1)       |
| tailless           | 3R     | 26559162 +       | Tor-Distal *    | -2346  | -479   | (1)       |
| tailless           | 3R     | 26559162 +       | Tor-Proxi *     | -230   | -174   | (1)       |
| twist              | 2R     | 17971350 +       |                 | -168   | -1151  | (6)       |
| zerknüllt          | 3R     | 2580616 -        |                 | 1226   | 413    | (5)       |

## References for File 1

1. Spirov, A. V., Bowler, T. & Reinitz, J. (2000) *Nucleic Acids Res* **28**, 337-340.
2. Berman, B. P., Nibu, Y., Pfeiffer, B. D., Tomancak, P., Celniker, S. E., Levine, M., Rubin, G. M. & Eisen, M. B. (2002) *Proc Natl Acad Sci U S A* **99**, 757-762.
3. Ip, Y. T., Park, R. E., Kosman, D., Bier, E. & Levine, M. (1992) *Genes Dev* **6**, 1728-1739.
4. Ip, Y. T., Park, R. E., Kosman, D., Yazdanbakhsh, K. & Levine, M. (1992) *Genes Dev* **6**, 1518-1530.
5. Markstein, M., Markstein, P., Markstein, V. & Levine, M. S. (2002) *Proc Natl Acad Sci U S A* **99**, 763-768.
6. Thisse, C., Perrin-Schmitt, F., Stoetzel, C. & Thisse, B. (1991) *Cell* **65**, 1191-1201.
