# Supplementary material
Source: PubMed Central journal article supplement (PMC139975)
Supplement: 1471-2105-3-30-S2.pdf [file 1471-2105-3-30-S2.pdf]

# File 2: Experimentally known binding sites and weight matrix construction for the gap genes

File 2: For each transcription factor (bicoid, caudal, dorsal, hunchback, knirps, Kruppel, tailless, torRE) the following data are shown:

- (1) the frequency matrix obtained by running WCONSENSUS
- (2) the alignment of the binding sites from the same WCONSENSUS run
- (3) the experimental binding site data. The heading for each site contains the annotated transcript ID (CT number), gene ID (CG number), and gene name. The last number corresponds to the distance of the site to 10000 bases upstream of translation start of that gene.

## BICOID

|   |    |    |    |    |    |    |    |    |    |    |    |
|---|----|----|----|----|----|----|----|----|----|----|----|
| A | 2  | 5  | 3  | 27 | 30 | 0  | 1  | 3  | 4  | 2  | 6  |
| C | 10 | 12 | 0  | 0  | 0  | 0  | 29 | 13 | 15 | 9  | 14 |
| G | 10 | 4  | 0  | 3  | 0  | 7  | 0  | 3  | 11 | 13 | 6  |
| T | 8  | 9  | 27 | 0  | 0  | 23 | 0  | 11 | 0  | 6  | 4  |

TCTGAGCTCCG  
 CCTAATCTGGC  
 TCTAATCTCGC  
 CTTAAGCTCGC  
 CGTAATCTGCT  
 TTTAATCCGTT  
 AATAATCCAGC  
 CTTAATCACCA  
 TTAAATCCCTC  
 GTTAATCTCCG  
 CTAAATCCGGC  
 GTTAATCCGTT  
 AATAATCTCGC  
 TATAATCGCAC  
 GCTAATCCCAG  
 CGTAATCCCCA  
 TCTAATCCAGA  
 TCTAATCCCTT  
 GCTAAGCTGGC  
 GCTAAGCTCCC  
 GATGATCCGGG  
 CCTAAGCCAGC  
 CGAAATCGCTG  
 CCTAATCGCGG  
 GCTGATCCCGC  
 CCTAAGCTGCA  
 GATAATCTGCA  
 GTTAATCAATA  
 TGTAATCAGGC  
 GTTAAGACGCC

>CT3134:t11:CG1378 8926  
 AAAATAAAAAACAAATATTTGCATTTTC  
 >CT3134:t11:CG1378 8921  
 GCTAAGAAATGCAAATATTTGTTTTTT  
 >CT3134:t11:CG1378 8844  
 ATTAATAACGCAATCTGAGCTCCGCA  
 >CT3134:t11:CG1378 8829

TGCGTTTTTAATAATAATTTTTATAAA  
>CT3134:t11:CG1378 8799  
TTACTTTAAATAATTTTATTTATTAA  
>CT3134:t11:CG1378 8696  
AAGGCAACGCCTAATCTGGCTCAGCCG  
>CT3134:t11:CG1378 8671  
CCACTTGAATCCTAAAGGCTCTCAAAA  
>CT3134:t11:CG1378 8644  
ACAGTGCCTCTAATCTCGCTTGGTCCT  
>CT3134:t11:CG1378 8596  
CGATTCCCTCGACTTAAGCTCGCCGCTT  
>CT3134:t11:CG1378 8574  
ATCTAAAATCCGTAATCTGCTTAAGCG  
>CT11169:Kr:CG3340 5900  
AAAATTTAATCCGTTTCTGAAGGTAGGC  
>CT11169:Kr:CG3340 5930  
CAGACAAATAATCCAGCCTTAAGCATGGTGAT  
>CT11169:Kr:CG3340 5951  
TCAAGCTTAATCACCATGCT  
>CT11169:Kr:CG3340 6001  
TTTTCCCTTAAATCCCTCTGTT  
>CT11169:Kr:CG3340 6013  
CCCTCTGTAAATCTCCGGCTT  
>CT11169:Kr:CG3340 6337  
TAACTGAACTAAATCCGGCTTAG  
>CT7758:eve:CG2328 5113  
CCGTGTAAATCCGTTTGCC  
>CT7758:eve:CG2328 5132  
TTGACTAATAATCTCGCTGAT  
>CT7758:eve:CG2328 5283  
CTGGACTATAATCGCACAAACGA  
>CT7758:eve:CG2328 5377  
CCCTTGGCTAATCCCAGCAA  
>CT27633:hb:CG9786 9273  
GACCAACGTAATCCCCATAGAAAACCG  
>CT27633:hb:CG9786 9382  
TTTCTGCTCTAATCCAGAATGGATC  
>CT27633:hb:CG9786 9488  
TGCCCATCTAATCCCTTGACGCGTG  
>CT27633:hb:CG9786 9314  
GCTCGCTGCTAAGCTGGCCAT  
>CT27633:hb:CG9786 9330  
GCCATCCGCTAAGCTCCCGGA  
>CT27633:hb:CG9786 9343  
TGGATTTGGATGATCCGGGAG  
>CT15191:kni:CG4717 6930  
GGGTACCTAAGCCAGCGAT  
>CT15191:kni:CG4717 6940  
AGGTAACGAAATCGCTGGC  
>CT15191:kni:CG4717 6951  
CGTTACCTAATCGCGGGA  
>CT15191:kni:CG4717 6961  
GGTAAGCTGATCCCGCGA  
>CT15191:kni:CG4717 6972  
GCTTACCTAAGCTGCAGA  
>CT15191:kni:CG4717 6983  
CCTAGGATAATCTGCAG  
>CT15191:kni:CG4717 8186  
TAGAAGTTAATCAATAAGAG  
>CT15191:kni:CG4717 8624  
TTCCCTGTAATCAGGCTATT

>CT3134:t11:CG1378 7154  
 AATGAAAGGGTTAAATAGCTG  
 >CT3134:t11:CG1378 7205  
 GAGAAAAGGGTTAAGACGCCAC

HUNCHBACK

|   |    |    |    |    |    |    |    |    |    |    |    |    |
|---|----|----|----|----|----|----|----|----|----|----|----|----|
| A | 17 | 0  | 0  | 0  | 0  | 1  | 11 | 7  | 3  | 11 | 5  | 8  |
| C | 12 | 0  | 1  | 1  | 0  | 0  | 3  | 8  | 6  | 11 | 9  | 18 |
| G | 14 | 4  | 0  | 0  | 0  | 0  | 5  | 8  | 25 | 7  | 10 | 4  |
| T | 0  | 39 | 42 | 42 | 43 | 42 | 24 | 20 | 9  | 14 | 19 | 13 |

AGTTTTTTTGTTT  
 ATTTTTGTGCC  
 CTCTTTACGGTT  
 CTTCTTTGTTCC  
 ATTTTTATGGGT  
 CGTTTTTTTGTTT  
 CTTTTTTTCGCTG  
 GTTTTTTTCCCC  
 ATTTTTTAATTC  
 GTTTTTAAGATC  
 GTTTTTACGAGC  
 CTTTTTATGATC  
 ATTTTTTTGCTT  
 CTTTTTCTTTTC  
 ATTTTTTCAGAC  
 GTTTTTTTCGCGA  
 GTTTTTTTTTTTC  
 GTTTTTAAGAGA  
 ATTTTTTGTTGT  
 GTTTTTACTTTG  
 ATTTTTTGCATT  
 GTTTTTATGACT  
 ATTTTTTTGCGC  
 ATTTTTTTGGCC  
 ATTTTTTGT TTC  
 CGTTTTGCGTTT  
 GTTTTTTGGCAT  
 GTTTTTTGGGCA  
 CTTTTTAAGCTA  
 ATTTTTTTCCCA  
 GTTTTTTTTTTT  
 GTTTTTGTTAAG  
 CTTTTTCACTCC  
 CTTTTTGGCTTT  
 CTTTTTATGAAT  
 ATTTTATTGAGT  
 ATTTTTGTATGC  
 ATTTTTTATAAC  
 GTTTTTTTGCTA  
 CTTTTTCCGCGG  
 GGTTTTTGGGTA  
 ATTTTTTTGGCA  
 ATTTTTTAACAGC

>CT7758:eve:CG2328 2812  
 GATCAGTTTTTTGTTTTGGCCG

>CT7758:eve:CG2328 2832  
CGACCGATTTTTGTGCCCGGTG  
>CT7758:eve:CG2328 2848  
CCGGTGCTCTCTTTACGGTTTATG  
>CT7758:eve:CG2328 2887  
CCCAGCTTCTTTGTTCCGGGCT  
>CT7758:eve:CG2328 2936  
TGCAGATTTTTATGGGTCCCG  
>CT7758:eve:CG2328 3038  
ATCACGTTTTTTGTTCCATTG  
>CT7758:eve:CG2328 3059  
GTGCGCTTTTTTCGCTGCGCT  
>CT7758:eve:CG2328 3076  
CGCTAGTTTTTTTCCCGAACC  
>CT7758:eve:CG2328 3108  
CTCTAATTTTTTAATTCTTCACG  
>CT7758:eve:CG2328 3212  
CTCTCGTTTTTAAGATCCGTT  
>CT7758:eve:CG2328 3260  
ATTACGTTTTTACGAGCTCGT  
>CT11169:Kr:CG3340 5802  
CAAATTGCTTTTTATGATCATGCAT  
>CT11169:Kr:CG3340 5830  
CAATTTATATTTTTTTGCTTTTCCT  
>CT11169:Kr:CG3340 5875  
TTACACTTTTTCTTTTCTGATCCA  
>CT11169:Kr:CG3340 5917  
GATTAAATTTTTTCAGACAAATA  
>CT11169:Kr:CG3340 6038  
CGCGACGCGTTTTTTTCGCGACTCC  
>CT11169:Kr:CG3340 6063  
CCTGCATTGTTTTTTTTTTCAGTTTCTT  
>CT11169:Kr:CG3340 6281  
TTTGTGTTTTTTAAGAGAAAT  
>CT11169:Kr:CG3340 6291  
CTTTGACATTTTTTGTGTTTTT  
>CT11169:Kr:CG3340 6305  
TTGCATTGTTTTTACTTTGACA  
>CT11169:Kr:CG3340 6315  
TACACATATTTTTTGCATTGTTTTT  
>CT7758:eve:CG2328 5469  
ATTATGTGTTTTTATGACTTTC  
>CT7758:eve:CG2328 5551  
ACTGGGTTATTTTTTTGCGCCG  
>CT7758:eve:CG2328 5634  
ACCCACGATTTTTTTGGCCAA  
>CT27633:hb:CG9786 9365  
GTGCGCATAATTTTTTGTCTGCTCTA  
>CT27633:hb:CG9786 8881  
CCCTTTTTCCCGTTTTGCGTTTTTAATA  
>CT27633:hb:CG9786 5895  
CTCTTTGCCGTTTTTTGGCATCTCCGCT  
>CT27633:hb:CG9786 5801  
TCGCCAATTGTTTTTTGGGCAACTTTAA  
>CT27633:hb:CG9786 5590  
CTGTATTCCACCTTTTTAAGCTAATTTTCG  
>CT27633:hb:CG9786 5489  
TTTAGACCAATTTTTTTCCAAGCGGAA  
>CT27633:hb:CG9786 5405  
TAATAGTTTTTTTTTTTAGTCCAAAATT  
>CT15191:kni:CG4717 7488

TAACGAGTTTTTGTAAAGAGTA  
 >CT15191:kni:CG4717 7568  
 CTTGACTTTTTTCACTCCGAAGT  
 >CT15191:kni:CG4717 7692  
 GTTCTTTCTTTTTGGCTTTGAGC  
 >CT15191:kni:CG4717 7724  
 TTAACTCTTTTTATGAATATTT  
 >CT15191:kni:CG4717 7833  
 ATTTGTATTTTATTGAGTATAA  
 >CT15191:kni:CG4717 8012  
 AAACCTATTTTTGTATGCTATT  
 >CT15191:kni:CG4717 8102  
 ATAGTATTTTTTATAACTTTTC  
 >CT15191:kni:CG4717 8153  
 ACTATCGTTTTTTTGCTATGAA  
 >CT15191:kni:CG4717 8309  
 CAAAACCTTTTTCCGCGGGAAA  
 >CT15191:kni:CG4717 8367  
 CCGCCGGTTTTTGGGTACATTT  
 >CT15191:kni:CG4717 8458  
 TGCTCATTTTTTTGGCATGGGC  
 >CT15191:kni:CG4717 8476  
 GACTTCATTTTTTAACAGCTGCT

KNIRPS

|   |    |    |    |    |    |    |    |    |    |    |    |    |    |    |    |
|---|----|----|----|----|----|----|----|----|----|----|----|----|----|----|----|
| A | 5  | 11 | 11 | 9  | 18 | 18 | 11 | 4  | 2  | 14 | 17 | 13 | 10 | 7  | 19 |
| C | 0  | 1  | 3  | 0  | 5  | 2  | 14 | 13 | 3  | 0  | 0  | 12 | 0  | 11 | 1  |
| G | 7  | 8  | 12 | 13 | 4  | 0  | 1  | 7  | 8  | 9  | 10 | 1  | 10 | 5  | 5  |
| T | 15 | 7  | 1  | 5  | 0  | 7  | 1  | 3  | 14 | 4  | 0  | 1  | 7  | 4  | 2  |

TAGAAAAGTAGATCA  
 AGAGCACCGGGCACA  
 TGGGAAATGGGAACG  
 TAGGAAAAGTAGATCA  
 AAAAAAAGTAGCGCA  
 GTGTAAGTGAAGTAA  
 GAGGATCGTAAAAAA  
 GGAGGTCGTAAAACC  
 TAAAAAACGGACGGA  
 GAGGATGGCAGAGCA  
 TTTGAACTGAACGGG  
 TTGACACCGAAGTGA  
 TCATAAAGTAGATCT  
 TTCGACCCGGGATCG  
 TAAAAAACGGACGGA  
 TGAGAACCCGAAAGA  
 TGGAACAATAAAGTT  
 AAAAATCGCTACACA  
 TGCACTTCTAAAAAA  
 GTAGGAACTTAAGCG  
 GAGAAACCTAATAAAA  
 TAGGCAAAAGGCTTA  
 AGATGTCCTTAGGAA  
 TGGGAACAAGACAAA  
 ATATCACGTGGCGTG  
 TTGTGAACTTACAAA  
 GACGATCATAAAGTA

>CT7758:eve:CG2328 2797  
 TGCATTAGAAAACCTAGATCAGTTTTT  
 >CT7758:eve:CG2328 2841  
 AACCGTAAAGAGAGACCCGGGCACAAA  
 >CT7758:eve:CG2328 2864  
 TGGGAAATGGGAACGCGGCCATAAACCC  
 >CT7758:eve:CG2328 3022  
 CGTATTAGGAAAGTAGATCACGTTT  
 >CT7758:eve:CG2328 3067  
 GAAAAAACTAGCGCAGCGAAAA  
 >CT11169:Kr:CG3340 6333  
 TGTGTAACCTGAACTAAATCCGGCTTAGG  
 >CG6494:h:CT20229 2620  
 GTTGAGGATCGTAAAAAACTGC  
 >CG6494:h:CT20229 2639  
 GACGGAGGTCGTAAAACCCGTT  
 >CG6494:h:CT20229 2652  
 GGCTTAAAAAACGGACGGAGGT  
 >CG6494:h:CT20229 2673  
 CAGAGGATGGCAGAGCAGAAAAG  
 >CG6494:h:CT20229 2693  
 CTGATTTGAACTGAACGGGTCA  
 >CG6494:h:CT20229 2708  
 AGAGTTGACACCGAACTGATTT  
 >CG6494:h:CT20229 3137  
 GATCATAAAGTAGATCTTAACC  
 >CG6494:h:CT20229 2606  
 TTCGACCCGGGATCGCAGTTTTTTT  
 >CG6494:h:CT20229 2648  
 CTTAAAAAACGGACGGAGGTCGTA  
 >CG6494:h:CT20229 2725  
 CCCGCTATGAGAACCCGAAAGAGT  
 >CG6494:h:CT20229 2755  
 AATCCGGCTGGAACAATAAAGTTT  
 >CG6494:h:CT20229 2791  
 TAAAAAATCGCTACACACTTCCCG  
 >CG6494:h:CT20229 2836  
 AATAAAGATTGCACTTCTAAAAAA  
 >CG6494:h:CT20229 2864  
 CAAATTGTAGGAACTTAAGCGGAA  
 >CG6494:h:CT20229 2886  
 AAATTCCGAGAAACCTAATAAATT  
 >CG6494:h:CT20229 2915  
 TTTTTTGATTAGGCAAAAGGCTTA  
 >CG6494:h:CT20229 2980  
 TAAAGAAGATGTCCTTAGGAAACT  
 >CG6494:h:CT20229 3041  
 TTTTTTATGGGAACAAGACAAAAA  
 >CG6494:h:CT20229 3077  
 AGATATCACGTGGCGTGGTATCAG  
 >CG6494:h:CT20229 3113  
 GACATGTTGTGAACTTACAAAGAC  
 >CG6494:h:CT20229 3127  
 TTACAAAGACGATCATAAAGTAGA

KRUPPEL

|   |    |    |    |    |    |    |    |   |   |
|---|----|----|----|----|----|----|----|---|---|
| A | 10 | 19 | 17 | 12 | 0  | 4  | 3  | 0 | 0 |
| C | 3  | 1  | 2  | 6  | 0  | 0  | 2  | 0 | 2 |
| G | 7  | 0  | 0  | 1  | 20 | 16 | 15 | 2 | 0 |

T | 0 0 1 1 0 0 0 18 18

AAACGGATT  
GACCGGGTT  
GAAGGGATT  
AACTGGGTT  
AAACGGGTT  
CAAAGAGTT  
CCACGGATT  
GATAGAGTT  
GAAAGAGGT  
CAACGGGTT  
GAAAGGCTT  
GAACGGGTC  
GAAAGAGTT  
AAAAGGCTT  
AAAAGGGTT  
AAAAGGGC  
AAAAGGGTT  
AAAAGGGTT  
AAAAGGGTT

>CT7758:eve:CG2328 4976  
GCGCAATATAACCCAATAATTT  
>CT7758:eve:CG2328 5112  
ATGGCAAACGGATTAACACGGC  
>CT7758:eve:CG2328 5300  
AACGAGACCGGGTTGCGAAGTC  
>CT7758:eve:CG2328 5494  
GATGTCTGAAGGGATTAGGGGCGC  
>CT7758:eve:CG2328 5545  
TAGCGAACTGGGTTATTTTTTTT  
>CT7758:eve:CG2328 5588  
GGCTCAAAACGGGTTAAGCTCGC  
>CG6494:h:CT20229 5901  
CTGCCTGATTTCGCAAAGAGTTT  
>CG6494:h:CT20229 6013  
GAGTTTCCACGGATTAGACCTC  
>CG6494:h:CT20229 6035  
GTTCTCTCTGGGATAGAGTTTA  
>CG6494:h:CT20229 6054  
TAGTCTCGCGCCGAAAGAGGTT  
>CG6494:h:CT20229 2633  
ATCCTCAACGGGTTTTACGACC  
>CG6494:h:CT20229 2661  
GAGCAGAAAGGCTTAAAAAACG  
>CG6494:h:CT20229 2686  
GAACTGAACGGGTCAGAGGATG  
>CG6494:h:CT20229 2724  
GCTATGAGAACCCGAAAGAGTT  
>CG6494:h:CT20229 2924  
TAGGCAAAAGGCTTAAAAAACA  
>CG6494:h:CT20229 2950  
GCAACCTTGGTGTTAATTGAGA  
>CG6494:h:CT20229 3057  
GACAAAAAAGGGTTTTGCGGAG  
>CT27633:hb:CG9786 9185  
ATTTAGTTAAGTCCCAGCAATCCTT  
>CT27633:hb:CG9786 8868  
GGGAAAAAGGGCATTACGAAT

>CT15191:kni:CG4717 7663  
 CGGCATAAAAGGGTTAAACAGGTAGCTC  
 >CT15191:kni:CG4717 7633  
 GCCCATAAAAGGGTTAAGCACATC  
 >CT15191:kni:CG4717 7604  
 GTACCAAAGGGTTGTTTCAGAC  
 >CT15191:kni:CG4717 7800  
 CTTTTAAAGGGTTACAATTAA

TAILLESS

|   |    |    |    |    |    |    |    |    |    |
|---|----|----|----|----|----|----|----|----|----|
| A | 12 | 1  | 1  | 5  | 2  | 11 | 1  | 0  | 0  |
| C | 8  | 2  | 2  | 1  | 3  | 1  | 17 | 2  | 3  |
| G | 0  | 2  | 1  | 0  | 15 | 5  | 0  | 1  | 2  |
| T | 0  | 15 | 16 | 14 | 0  | 3  | 2  | 17 | 15 |

CTTTAACTT  
 ATTAAATTT  
 ATTTGTCTG  
 ATTACGCC  
 CTCCGGCTT  
 ATTTGACTT  
 CTTAGGATT  
 AGTTGCCTT  
 ATTAGACTC  
 CTTTCACCC  
 CATTGTCTT  
 CTTTGGCGG  
 ATTAGTTTT  
 ATATGGCTT  
 ATGTCACTT  
 ATTTGACTT  
 AGCTGACTT  
 CCTTGACTT  
 ATTTGACTT  
 CCTTGACTT

>CT11169:Kr:CG3340 5777  
 TGAAAAGTCTTTAACTTAATCGACATG  
 >CT11169:Kr:CG3340 5912  
 AAACGGATTAAATTTTTTCAGA  
 >CT11169:Kr:CG3340 5930  
 AAGGCTGGATTATTTGTCTG  
 >CT11169:Kr:CG3340 5981  
 AATCCGTCAATATTACGCCCT  
 >CT11169:Kr:CG3340 6013  
 CCCTCTGTTAATCTCCGGCTTAGA  
 >CT11169:Kr:CG3340 6259  
 TTTAAGAGAAATTTGACTTCTTAATTGCCGACGA  
 >CT11169:Kr:CG3340 6354  
 GCTTAGGATTCTTGCGTCATA  
 >CT27633:hb:CG9786  
 GCAAAGCGAGTTGCCTTCATAAAATCTCGTGGCGTGTGCGACTGGAA  
 >CT27633:hb:CG9786  
 TCTAATGACCATTAGACTCATAGATATTGTA  
 >CT27633:hb:CG9786  
 TTTTTTGTGCGCGACCTCAACCCTTTCACCCAT  
 >CT27633:hb:CG9786  
 GTTTCCACCTAATGTGCGCGTCATTGTCTTCTTTATGACG

>CT27633:hb:CG9786  
 CAACCCTTTGGCGGACGAGAAAGTTGCTAGGA  
 >CT27633:hb:CG9786  
 CAAGCCGCGATCTTCTTGGAATTAGTTTTGGTC  
 >CT27633:hb:CG9786  
 ATATTCATAAAGTTATATATGGCTTTTAA  
 >CT27633:hb:CG9786  
 TAACTACATGTCACCTTTCAGGTTTTTACATT  
 >CT15191:kni:CG4717 7442  
 TTCCATTTGACTTTCATTTGT  
 >CT15191:kni:CG4717 7466  
 CGTTAGCTGACTTCCCAGAAG  
 >CT15191:kni:CG4717 7568  
 GGAACCTTGACTTTTTCACTC  
 >CT15191:kni:CG4717 7448  
 TTCCATTTGACTTTCATTTGT  
 >CT15191:kni:CG4717 7574  
 GGAACCTTGACTTTTTCACTC

|   | CAUDAL |   |   |   |    |    |    |    |    |   |   |    |   |   |
|---|--------|---|---|---|----|----|----|----|----|---|---|----|---|---|
| A | 0      | 8 | 7 | 2 | 1  | 1  | 2  | 0  | 3  | 8 | 8 | 5  | 5 | 2 |
| C | 12     | 4 | 0 | 7 | 0  | 1  | 1  | 0  | 0  | 3 | 1 | 0  | 8 | 9 |
| G | 2      | 6 | 7 | 1 | 1  | 1  | 0  | 1  | 0  | 0 | 7 | 12 | 2 | 1 |
| T | 5      | 1 | 5 | 9 | 17 | 16 | 16 | 18 | 16 | 8 | 3 | 2  | 4 | 7 |

CAGTTTTTTTACGAT  
 CGGGTTTTTACGACC  
 CCGTTTTTTAAGCC  
 GAACTGATTTGAAC  
 CAACTCTTTCGGGT  
 CGGATTTTACAACC  
 TAAAGTTTTTACGACC  
 CGATTTTTTAAAAT  
 TGTTTTTTTTAGAA  
 TCTTTATTTTGCA  
 GAATTTATTAGGTT  
 CCACATTTTTTGAT  
 CTGTTTTTTAAGCC  
 CATCTTCTTTATCT  
 TATCTTTTTAAGTC  
 CGATTTTTTATGGG  
 CAGTTTTTTTTTTC  
 CGTCTTTGTAAGTT  
 TCGCTTTTATGGCC

>CG6494:h:CT20229 2617  
 ATCGCAGTTTTTTACGATCCTCA  
 >CG6494:h:CT20229 2636  
 CTCAACGGGTTTTACGACCTCCG  
 >CG6494:h:CT20229 2657  
 CGTCCGTTTTTTAAGCCTTTCTG  
 >CG6494:h:CT20229 2698  
 ACCGAACTGATTTGAACTGAACG  
 >CG6494:h:CT20229 2719  
 GTGTCAACTCTTTCGGGTTCTCA  
 >CG6494:h:CT20229 2743  
 CCAGCCGGATTTTACAACCCGCT  
 >CG6494:h:CT20229 2762  
 CTGGAACAATAAAGTTTTTGACC  
 >CG6494:h:CT20229 2801

GTAGCGATTTTTTAAAATGTTTT  
 >CG6494:h:CT20229 2829  
 TTTTGTTTTTTTTAGAAGTGCAA  
 >CG6494:h:CT20229 2845  
 AGTGCAATCTTTATTTTGGCAAATTGT  
 >CG6494:h:CT20229 2878  
 TTAAGCGGAATTTATTAGGTTTC  
 >CG6494:h:CT20229 2897  
 TTTCTCGGAATTTCCACATTTTTTGATTAGGCAA  
 >CG6494:h:CT20229 2928  
 CGGGCTGTTTTTTAAGCCTTTTG  
 >CG6494:h:CT20229 2971  
 GGACATCTTCTTTATCTATCCAT  
 >CG6494:h:CT20229 2992  
 CCTTAGGAAACTATCTTTTTAAGTCGAAAA  
 >CG6494:h:CT20229 3035  
 ATGCGATTTTTTATGGGAACAA  
 >CG6494:h:CT20229 3098  
 CAGTTTTTTTTTCCGACATGTT  
 >CG6494:h:CT20229 3121  
 TATGATCGTCTTTGTAAGTTCAC  
 >CT3134:t11:CG1378 7083  
 TCGCTTTTATGGCCCAAAGTTGCC

DORSAL

|   |    |    |    |    |    |    |    |    |    |    |    |    |    |
|---|----|----|----|----|----|----|----|----|----|----|----|----|----|
| A | 5  | 0  | 1  | 5  | 15 | 5  | 4  | 1  | 0  | 0  | 0  | 3  | 9  |
| C | 5  | 2  | 3  | 1  | 1  | 2  | 0  | 1  | 13 | 30 | 20 | 19 | 0  |
| G | 5  | 18 | 23 | 24 | 2  | 1  | 0  | 1  | 2  | 0  | 4  | 6  | 10 |
| T | 15 | 10 | 3  | 0  | 12 | 22 | 26 | 27 | 15 | 0  | 6  | 2  | 11 |

GGGGATTTCCCCG  
 TGGGATATTCCCCG  
 CGGGAATTCCTT  
 TGGGTATACCCGT  
 TGCGATTTTCTCG  
 TTCGATTTTCTCG  
 TTGGGTTTTCTCT  
 TTGACTTTTCTGCT  
 TGGATTTTCTGT  
 AGGCATTTTCCCA  
 CTGGATTTTCCGA  
 AGGGTTTTGCCCT  
 GTGGAGTTCCCCT  
 TGGGTTATTCTTT  
 CTGGTTTTCCCGA  
 CTGGATTTCCCAA  
 TGGGTTTCTCCCA  
 TTGGTTTTCCAG  
 AGTGTTTTCCGCT  
 AGGGTTTTCCCA  
 TCGGGTTGGCCCG  
 GCGGATTTTCCCG  
 TGGGTCATCCCGG  
 AGTAATTTCCCAT  
 TTCGTATTTCCCT  
 TTGGAATTCCGCG  
 GGAACTTTCCCA  
 TGTGTTTTTCCCA  
 GCGGAATTTCTG  
 GGGGAAATTTCCCG

>sog 705 up transl start  
ATTACGGGGATTTCCCCGCACC  
>sog 795 up transl start  
GGACATGGGATATTCCCGACGGC  
>sog 879 up transl start  
GAAAGCGGAATTCCCTTCCGC  
>sog 958 up transl start  
CCATTTGGGTATACCCGTATCT  
>CT10023:twi:CG2956 8781  
CGCCTGCGATTTTCTCGGTACGT  
>CT10023:twi:CG2956 9660  
GGATTTTCGATTTTCTCGAGCGGC  
>CT10023:twi:CG2956 9542  
TTCTTTGGGTTTTCTCTCGATTT  
>CT10023:twi:CG2956 8727  
AAATTTGACTTTTTCGCTCGTATT  
>CT10023:twi:CG2956 9572  
GCTCTGGATTTTCTGTTTCTCT  
>CT10023:twi:CG2956 9526  
TCCCAGGCATTTTCCCAAATCGA  
>CT10023:twi:CG2956 8740  
CGCTCGTATTTTCTGGATTTTCGGAGCTCCG  
>CT10023:twi:CG2956 8531  
CCAACAGGGTTTTGCCCTGTCCC  
>CT10023:twi:CG2956 8841  
TTTCGTGGAGTTCCCCTCGGTT  
>CT10023:twi:CG2956 9556  
TTTCTGTTTCTCTTGGGTTATTCTTTGGG  
>CT1179:zen:CG1046 2615  
AGTATCTGGTTTTCCCGAAAATC  
>CT1179:zen:CG1046 2889  
GACTTCTGGATTTCCCAAACACT  
>CT1179:zen:CG1046 2938  
TTGATTGGGTTTTCTCCCAGTTAT  
>CT1179:zen:CG1046 3007  
AGAGCTTGGTTTTCCAGGACA  
>CT13146:sna:CG3956 4726  
TGGCGCCAGTGTTTTCCGCTTCATTCA  
>CT13146:sna:CG3956 4691  
CCCCGAAAGGGTTTTCCCAAATAAT  
>CT13146:sna:CG3956 4766  
TTCCTGGTTCGGTTGGCCCGCTCATTAG  
>CT13146:sna:CG3956 4831  
CGACAAGTTCGGATTTTCCCGGACATCA  
>CT13146:sna:CG3956 4997  
CTACCTGGTGGGTCATCCCGGATATCTC  
>CT13146:sna:CG3956 5109  
GGATTTAAAGTAATTTCCCATCTTATCC  
>CT13146:sna:CG3956 5174  
TTTCCATTTTCGTATTTCCCTGCAATGGA  
>CT13146:sna:CG3956 5262  
GCGGGGAATTGGAATTCGCGCTGGAAT  
>CT13146:sna:CG3956 5460  
ACTATCGATGGGAACTTTCCCAACTCCCAC  
>CT1008:rho:CG1004 6356  
CGATGTGTGTTTTCCACCGCA  
>CT1008:rho:CG1004 6492  
GGCGGGCGGAATTTCTGATTCTG  
>CT1008:rho:CG1004 6551  
TTTTGGGGGAAATTTCCCGGGCGA

TORSO RESPONSE ELEMENT

|   |   |   |   |   |   |   |   |   |   |   |   |
|---|---|---|---|---|---|---|---|---|---|---|---|
| A | 0 | 0 | 0 | 0 | 0 | 6 | 6 | 0 | 0 | 6 | 6 |
| C | 0 | 1 | 5 | 0 | 5 | 0 | 0 | 0 | 0 | 0 | 0 |
| G | 0 | 4 | 1 | 0 | 0 | 0 | 0 | 1 | 6 | 0 | 0 |
| T | 6 | 1 | 0 | 6 | 1 | 0 | 0 | 5 | 0 | 0 | 0 |

TCCTCAAGGAA  
 TGCTCAATGAA  
 TGCTCAATGAA  
 TGCTCAATGAA  
 TGCTCAATGAA  
 TTGTTAATGAA

>CT3134:t11:CG1378 7370  
 TTTTCGTCCTCAAGGAAC TTTGT  
 >CT3134:t11:CG1378 7052  
 ACTCAATGCTCAATGAATTCGGA  
 >CT3134:t11:CG1378 9582  
 GTTCCTTGCTCAATGAATTTTTC  
 >t11 Dvir D3 LiawPNAS 90 858 1993  
 GACGGCTGCTCAATGAATTTTTC  
 >t11 Dvir distal LiawGen&dev1995  
 CTGCGCTGCTCAATGAACGGTGC  
 >CT3134:t11:CG1378 9418  
 CGACAGTTGTTAATGAAGAGATA
