# Supplementary material
Source: PubMed Central journal article supplement (PMC139975)
Supplement: 1471-2105-3-30-S3.pdf [file 1471-2105-3-30-S3.pdf]

**File 3A:** The **146 Ahab** module predictions were examined for the presence of neighboring genes with blastoderm expression based on the BDGP/Celera genome annotation (Release 2) and the existing literature. The four genes closest to the module were examined, and the position of the module relative to the patterned gene is noted, including whether other genes are more proximal (up = upstream, down = downstream, intra = intragenic, 1 = closest gene, 2 = 2<sup>nd</sup> closest gene etc). The list also includes genes/regions that were hit more than once. The columns give the rank and score of each module, and indicate whether the module was recovered with any of the other methods (File 3A = Ahab 146, File 3B = Ahab – Tll, File 3C = Ahab window 700, File 5 = Gibbs on hairy + Ahab). Modules whose annotated binding sites were used to construct weight matrices are marked by a star.

| Rank  | Score | Gene               | Genomic organization | Comments                                                   | Rank in File |    |     |     | References                 |
|-------|-------|--------------------|----------------------|------------------------------------------------------------|--------------|----|-----|-----|----------------------------|
|       |       |                    |                      |                                                            | 3A           | 3B | 3C  | 5   |                            |
| 1 *   | 37.82 | hairy              | up / 9.2 kb / 1      |                                                            | 1            | 1  | 3   | 2   | (1)                        |
| 2 *   | 28.29 | knirps             | up / 1.6 kb / 1      |                                                            | 2            | 5  | 26  | -   | (2)                        |
| 3 *   | 27.24 | tailless           | up / 2.6 kb / 1      |                                                            | 3            | 2  | 1   | -   | (3)                        |
| 5 *   | 25.32 | knirps             | up / 1.1 kb / 1      |                                                            | 5            | -  | 2   | -   | (2)                        |
| 6     | 23.97 | Cyp6V1             | down / 1.6 kb / 1    |                                                            | 6            | 4  | 16  | -   | double hit, see module 14  |
| 8     | 20.80 | runt               | up / 3.2 kb / 1      |                                                            | 8            | 10 | 10  | -   | (4)                        |
| 9     | 19.89 | optix = six3       | down / 11 kb / 2     | 1: down 3.7 kb (CG12769)                                   | 9            | -  | 68  | -   | (5)                        |
| 10    | 19.75 | Dichaete           | down / 2.3 kb / 1    |                                                            | 10           | 11 | 11  | -   | (6, 7)                     |
| 11    | 19.66 | CG13595?           | down / 4.5 kb / 2    | 1: up 1.2 kb (CG4871)                                      | 11           | 59 | 19  | -   | double hit, see module 137 |
| 14    | 19.32 | Cyp6V1             | up / 6 kb / 1        |                                                            | 14           | 41 | 28  | -   | double hit, see module 6   |
| 17    | 18.88 | Tenascin-m         | up / 110 kb /        | neighboring CGs very small ORFs                            | 17           | -  | 33  | -   | (8)                        |
| 18    | 18.87 | giant              | down / 14.5 kb / 2   | 1: up 1.3 kb (CG12469)                                     | 18           | 13 | -   | -   | (9)                        |
| 20 *  | 18.76 | Krüppel            | up / 4.1 kb / 1      |                                                            | 20           | 12 | 5   | -   | (10, 11)                   |
| 23    | 18.30 | ken                | intra                |                                                            | 23           | 19 | 48  | -   | (12)                       |
| 24    | 18.29 | giant              | up / 2.1 kb / 1      |                                                            | 24           | 62 | 36  | -   | (9)                        |
| 25    | 18.29 | hairy              | up / 4.7 kb / 1      |                                                            | 25           | 8  | 8   | -   | (1)                        |
| 27    | 18.06 | hairy              | up / 5.4 kb / 1      |                                                            | 27           | 8  | 8   | -   | (1)                        |
| 34    | 17.36 | hairy              | up / 10.4 kb / 1     |                                                            | 34           | 30 | 193 | 1+4 | (1)                        |
| 36 *  | 17.25 | even skipped       | up / 3.5 kb / 1      |                                                            | 36           | 26 | 9   | -   | (13, 14)                   |
| 37    | 17.15 | knirps-like        | intra                |                                                            | 37           | -  | 117 | -   | (15)                       |
| 41 *  | 17.02 | hairy              | up / 6.2 kb / 1      |                                                            | 41           | 49 | -   | 3   | (1)                        |
| 43    | 16.94 | brinker            | up / 10.9 kb / 2     | 1: up 5.6 kb (unc 119)                                     | 43           | -  | 41  | -   | (16)                       |
| 45    | 16.83 | pipsqueak          | intra                |                                                            | 45           | -  | 20  | -   | (17)                       |
| 46    | 16.82 | teashirt           | intra                |                                                            | 46           | -  | 29  | -   | (18)                       |
| 48 *  | 16.80 | short gastrulation | intra                |                                                            | 48           | 7  | 25  | -   | (19)                       |
| 51    | 16.76 | abdominal-A        | up / 17 kb / 1       |                                                            | 51           | -  | 122 | -   | (20)                       |
| 54    | 16.65 | Abdominal-B        | up / 15.3 kb / 2     | 1: down 11.7 kb (CG11648)                                  | 54           | 33 | -   | -   | (21)                       |
| 55    | 16.62 | echinoid           | up / 58 kb / 2       | 1: down 11.8 kb (CG 10039 / small ORF)                     | 55           | -  | 111 | -   | double hit, see module 93  |
| 58    | 16.34 | CG2118/Acf1/faf    | intra                | 2: up 2.4 kb Acf1 3: 1.5 kb down (faf)                     | 58           | -  | -   | -   | double hit, see module 69  |
| 61    | 16.20 | vnd                | intra                |                                                            | 61           | 9  | 30  | -   | (22)                       |
| 69    | 16.01 | faf/Acf1/CG2118    | intra                | 2: up 5.2 kb Acf1 3: down 2 kb CG2118                      | 69           | -  | -   | -   | double hit, see module 58  |
| 75    | 15.90 | cap n' collar      | up / 4.3 kb / 1      |                                                            | 75           | 63 | -   | -   | (23)                       |
| 76 *  | 15.89 | even skipped       | up / 1.7 kb / 1      |                                                            | 76           | 42 | 283 | -   | (13, 14)                   |
| 91    | 15.69 | runt               | up / 9.67 / 1        |                                                            | 91           | 45 | 112 | -   | (4)                        |
| 93    | 15.66 | echinoid           | intra                |                                                            | 93           | -  | 47  | -   | double hit, see module 55  |
| 105   | 15.51 | bruno 3            | up / 95 kb / 2       | 1: down 89 kb                                              | 105          | 48 | 236 | -   | double hit, see module 130 |
| 117   | 15.37 | CG5060             | up / 31.1 kb         | uncertain which locus but good evidence for control region | 117          | 54 | 195 | -   | double hit, see module 132 |
| 120 * | 15.34 | tailless           | up / -.64 kb / 1     |                                                            | 120          | 24 | -   | -   | (3)                        |
| 124   | 15.32 | proboscopedia      | intra                |                                                            | 124          | -  | 284 | -   | (24)                       |
| 126   | 15.29 | runt               | up / 17.2 kb / 3     | 1: 3.7 kb up (CG1338) 2: 6.6 kb down (CG1835)              | 126          | 57 | 57  | -   | (4)                        |
| 129 * | 15.24 | hunchback          | up / 3.34 kb / 1     |                                                            | 129          | -  | 37  | 5   | (25)                       |
| 130   | 15.22 | bruno 3            | up / 25.1 kb /       |                                                            | 130          | -  | -   | -   | double hit, see module 105 |
| 132   | 15.18 | CG5060             | up / 30.1 kb         |                                                            | 132          | -  | -   | -   | double hit, see module 117 |

## References for File 3A

1. Ingham, P., Howard, K. & Ish-Horowicz, D. (1985) *Nature* **318**, 493-445.
2. Nauber, U., Pankratz, M. J., Kienlin, A., Seifert, E., Klemm, U. & Jackle, H. (1988) *Nature* **336**, 489-492.
3. Pignoni, F., Baldarelli, R. M., Steingrimsson, E., Diaz, R. J., Patapoutian, A., Merriam, J. R. & Lengyel, J. A. (1990) *Cell* **62**, 151-163.
4. Gergen, J. P. & Butler, B. A. (1988) *Genes Dev* **2**, 1179-1193.
5. Seo, H. C., Curtiss, J., Mlodzik, M. & Fjose, A. (1999) *Mech Dev* **83**, 127-139.
6. Russell, S. R., Sanchez-Soriano, N., Wright, C. R. & Ashburner, M. (1996) *Development* **122**, 3669-3676.
7. Nambu, P. A. & Nambu, J. R. (1996) *Development* **122**, 3467-3475.
8. Baumgartner, S., Martin, D., Hagios, C. & Chiquet-Ehrismann, R. (1994) *Embo J* **13**, 3728-3740.
9. Mohler, J., Eldon, E. D. & Pirrotta, V. (1989) *Embo J* **8**, 1539-1548.
10. Gaul, U. & Jackle, H. (1987) *Cell* **51**, 549-555.
11. Knipple, D. C., Seifert, E., Rosenberg, U. B., Preiss, A. & Jackle, H. (1985) *Nature* **317**, 40-44.
12. Kuhnlein, R. P., Chen, C. K. & Schuh, R. (1998) *Mech Dev* **79**, 161-164.
13. Frasch, M. & Levine, M. (1987) *Genes Dev* **1**, 981-995.
14. Macdonald, P. M., Ingham, P. & Struhl, G. (1986) *Cell* **47**, 721-734.
15. Rothe, M., Nauber, U. & Jackle, H. (1989) *Embo J* **8**, 3087-3094.
16. Ashe, H. L., Mannervik, M. & Levine, M. (2000) *Development* **127**, 3305-3312.
17. Berman, B. P., Nibu, Y., Pfeiffer, B. D., Tomancak, P., Celniker, S. E., Levine, M., Rubin, G. M. & Eisen, M. B. (2002) *Proc Natl Acad Sci U S A* **99**, 757-762.
18. Roder, L., Vola, C. & Kerridge, S. (1992) *Development* **115**, 1017-1033.
19. Francois, V., Solloway, M., O'Neill, J. W., Emery, J. & Bier, E. (1994) *Genes Dev* **8**, 2602-2616.
20. Karch, F., Bender, W. & Weiffenbach, B. (1990) *Genes Dev* **4**, 1573-1587.
21. Celniker, S. E., Keelan, D. J. & Lewis, E. B. (1989) *Genes Dev* **3**, 1424-1436.
22. Chu, H., Parras, C., White, K. & Jimenez, F. (1998) *Genes Dev* **12**, 3613-3624.
23. Mohler, J., Mahaffey, J. W., Deutsch, E. & Vani, K. (1995) *Development* **121**, 237-247.
24. Randazzo, F. M., Cribbs, D. L. & Kaufman, T. C. (1991) *Development* **113**, 257-271.
25. Tautz, D. (1988) *Nature* **332**, 281-284.

**File 3B:** 67 modules predicted by Ahab after the removal of the least specific matrix (Tailless) were examined for the presence of neighboring genes with blastoderm expression based on the BDGP/Celera genome annotation (Release 2) and the existing literature. The four genes closest to the module were examined, and the position of the module relative to the patterned gene is noted, including whether other genes are more proximal (up = upstream, down = downstream, intra = intragenic, 1 = closest gene, 2 = 2<sup>nd</sup> closest gene etc). The list also includes genes/regions that were hit more than once. The columns give the rank and score of each module, and indicate whether the module was recovered with any of the other methods (File 3A = Ahab 146, File 3B = Ahab – TII, File 3C = Ahab window 700, File 5 = Gibbs on hairy + Ahab). Modules whose annotated binding sites were used to construct weight matrices are marked by a star.

| Rank | Score | Gene               | Genomic organization | Comments                                    | Rank in File |    |     |     | References                        |
|------|-------|--------------------|----------------------|---------------------------------------------|--------------|----|-----|-----|-----------------------------------|
|      |       |                    |                      |                                             | 3A           | 3B | 3C  | 5   |                                   |
| 1 *  | 35.02 | hairy              | up / 9.2 kb / 1      |                                             | 1            | 1  | 3   | 2   | (1)                               |
| 2 *  | 26.71 | tailless           | up / 2.7 kb / 1      |                                             | 3            | 2  | 1   | -   | (2)                               |
| 4    | 23.97 | Cyp6V1             | down / 1.6 kb / 1    |                                             | 6            | 4  | 16  | -   | double hit, see module 41         |
| 5 *  | 23.31 | knirps             | up / 1.6 kb / 1      |                                             | 2            | 5  | 2   | -   | (3)                               |
| 7 *  | 20.64 | short gastrulation | intra                |                                             | 48           | 7  | 25  | -   | (4)                               |
| 8    | 20.13 | hairy              | up / 5.2 kb / 1      |                                             | 27+25        | 8  | 8   | -   | (1)                               |
| 9    | 20.09 | vnd                | intra                |                                             | 61           | 9  | 30  | -   | (5)                               |
| 10   | 19.98 | runt               | up / 3.2 kb / 1      |                                             | 8            | 10 | 10  | -   | (6)                               |
| 11   | 19.75 | Dichaete           | down / 2.3 kb / 1    | 2: up 41kb (CG6419)                         | 10           | 11 | 11  | -   | (7, 8)                            |
| 12 * | 19.73 | Krüppel            | up / 4.3 kb / 1      |                                             | 20           | 12 | 5   | -   | (9, 10)                           |
| 13   | 18.87 | giant              | down / 14.5 kb / 2   | 1: up 1.3 kb (CG12496)                      | 18           | 13 | -   | -   | (11)                              |
| 19   | 18.23 | ken                | intra                |                                             | 23           | 19 | 48  | -   | (12)                              |
| 24 * | 17.46 | tailless           | up / -.5 kb / 1      |                                             | 120          | 24 | -   | -   | (2)                               |
| 26 * | 17.25 | even skipped       | up / 3.5 kb / 1      |                                             | 36           | 26 | 9   | -   | (13, 14)                          |
| 30   | 16.52 | hairy              | up / 10.5 kb / 1     |                                             | 34           | 30 | 193 | 1+4 | (1)                               |
| 33   | 16.27 | Abdominal-B        | up / 15.3 kb / 2     | 1: down 11.7 kb (CG11648)                   | 54           | 33 | -   | -   | (15)                              |
| 41   | 15.85 | Cyp6V1             | up / 6 kb / 1        |                                             | 14           | 41 | 28  | -   | double hit, see module 4          |
| 42   | 15.79 | even skipped       | up / 1.4 kb / 1      |                                             | 76           | 42 | 283 | -   | (13, 14)                          |
| 45   | 15.69 | runt               | up / 9.6 kb / 1      |                                             | 91           | 45 | 112 | -   | (6)                               |
| 48   | 15.51 | bruno 3            | up / 95 kb / 2       | 1: down 89 kb (CG8757)                      | 105          | 48 | 236 | -   | double hit in File 3A (105 + 130) |
| 49 * | 15.48 | hairy              | up / 6.2 kb / 1      |                                             | 41           | 49 | -   | 3   | (1)                               |
| 54   | 15.37 | CG5060             | up / 31 kb / 4       | 1: 2: 3: down                               | 117          | 54 | 195 | -   | double hit in File 3A (117 + 132) |
| 57   | 15.25 | runt               | up / 17 kb / 3       | 1: up 3.8 kb (CG1338) 2: down 8 kb (CG1835) | 126          | 57 | 57  | -   | (6)                               |
| 62   | 15.17 | giant              | up / 2 kb / 1        |                                             | 24           | 62 | 36  | -   | (11)                              |
| 63   | 15.08 | cap n' collar      | up / 4.3 kb / 1      |                                             | 75           | 63 | -   | -   | (16)                              |

## References for File 3B

- Ingham, P., Howard, K. & Ish-Horowicz, D. (1985) *Nature* **318**, 493-445.
- Pignoni, F., Baldarelli, R. M., Steingrimsson, E., Diaz, R. J., Patapoutian, A., Merriam, J. R. & Lengyel, J. A. (1990) *Cell* **62**, 151-163.
- Nauber, U., Pankratz, M. J., Kienlin, A., Seifert, E., Klemm, U. & Jackle, H. (1988) *Nature* **336**, 489-492.
- Francois, V., Solloway, M., O'Neill, J. W., Emery, J. & Bier, E. (1994) *Genes Dev* **8**, 2602-2616.
- Chu, H., Parras, C., White, K. & Jimenez, F. (1998) *Genes Dev* **12**, 3613-3624.
- Gergen, J. P. & Butler, B. A. (1988) *Genes Dev* **2**, 1179-1193.
- Russell, S. R., Sanchez-Soriano, N., Wright, C. R. & Ashburner, M. (1996) *Development* **122**, 3669-3676.
- Nambu, P. A. & Nambu, J. R. (1996) *Development* **122**, 3467-3475.
- Gaul, U. & Jackle, H. (1987) *Cell* **51**, 549-555.
- Knipple, D. C., Seifert, E., Rosenberg, U. B., Preiss, A. & Jackle, H. (1985) *Nature* **317**, 40-44.
- Mohler, J., Eldon, E. D. & Pirrotta, V. (1989) *Embo J* **8**, 1539-1548.
- Kuhnlein, R. P., Chen, C. K. & Schuh, R. (1998) *Mech Dev* **79**, 161-164.
- Frasch, M. & Levine, M. (1987) *Genes Dev* **1**, 981-995.
- Macdonald, P. M., Ingham, P. & Struhl, G. (1986) *Cell* **47**, 721-734.
- Celniker, S. E., Keelan, D. J. & Lewis, E. B. (1989) *Genes Dev* **3**, 1424-1436.
- Mohler, J., Mahaffey, J. W., Deutsch, E. & Vani, K. (1995) *Development* **121**, 237-247.

**File 3C:** 290 modules predicted by Ahab after the window size had been increased to 700 bp were examined for the presence of neighboring genes with blastoderm expression based on the BDGP/Celera genome annotation (Release 2) and the existing literature. The four genes closest to the module were examined, and the position of the module relative to the patterned gene is noted, including whether other genes are more proximal (up = upstream, down = downstream, intra = intragenic, 1 = closest gene, 2 = 2<sup>nd</sup> closest gene etc). The list also includes genes/regions that were hit more than once. The columns give the rank and score of each module, and indicate whether the module was recovered with any of the other methods (File 3A = Ahab 146, File 3B = Ahab – TII, File 3C = Ahab window 700, File 5 = Gibbs on hairy + Ahab). Modules whose annotated binding sites were used to construct weight matrices are marked by a star.

| Rank | Score | Gene               | Genomic organization | Comments                                    | Rank in File |    |     |   | References                                     |
|------|-------|--------------------|----------------------|---------------------------------------------|--------------|----|-----|---|------------------------------------------------|
|      |       |                    |                      |                                             | 3A           | 3B | 3C  | 5 |                                                |
| 1 *  | 38.96 | tailless           | up / 2.8 kb / 1      |                                             | 3            | 2  | 1   | - | (1)                                            |
| 2 *  | 34.48 | knirps             | up / 1.1 kb / 1      |                                             | 2+5          | 5  | 2   | - | (2)                                            |
| 3 *  | 33.99 | hairy              | up / 9.2 kb / 1      |                                             | 1            | 1  | 3   | 2 | (3)                                            |
| 5 *  | 26.64 | Krüppel            | up / 4.3 kb / 1      |                                             | 20           | 12 | 5   | - | (4, 5)                                         |
| 8    | 25.42 | hairy              | up / 5 kb / 1        |                                             | 25           | 8  | 8   | - | (3)                                            |
| 9 *  | 23.21 | even skipped       | up / 3.7 kb / 2      | 1: down 2.7 kb (CG12134)                    | 36           | 26 | 9   | - | (6, 7)                                         |
| 10   | 22.86 | runt               | up / 3.4 kb / 1      |                                             | 8            | 10 | 10  | - | (8)                                            |
| 11   | 22.70 | Dichaete           | down / 2.3 kb / 1    |                                             | 10           | 11 | 11  | - | (9, 10)                                        |
| 16   | 22.13 | Cyp6v1             | down / 1.5 kb / 1    | 2: up 5.5 kb (CG1835 - vsmall ORF)          | 6            | 4  | 16  | - | Double hit (16 + 28), also in File 3A (6 + 16) |
| 20   | 21.37 | pipsqueak          | intra                |                                             | 45           | -  | 20  | - | (11)                                           |
| 24   | 20.96 | Krüppel            | up / 1 kb / 1        |                                             | -            | -  | 24  | - | (4, 5)                                         |
| 25 * | 20.94 | short gastrulation | intra                |                                             | 48           | 7  | 25  | - | (12)                                           |
| 26   | 20.86 | knirps             | up / 1.8 kb / 1      |                                             | 2            | 5  | 26  | - | (2)                                            |
| 28   | 20.51 | Cyp6v1             | up / 6 kb / 1        |                                             | 14           | 41 | 28  | - | double hit (16 + 28), also in File 3A (6+16)   |
| 29   | 20.48 | teashirt           | intra                |                                             | 46           | -  | 29  | - | (13)                                           |
| 30   | 20.47 | vnd                | intra                |                                             | 61           | 9  | 30  | - | (14)                                           |
| 33   | 20.01 | Tenascin-m         | up / 94 kb / 4       | neighboring CGs v small ORFs                | 17           | -  | 36  | - | (15)                                           |
| 36   | 19.87 | giant              | up / 1.9 kb / 1      |                                             | 24           | 62 | 36  | - | (16)                                           |
| 37   | 19.86 | hunchback          | up / 3.2 kb / 1      |                                             | 129          | -  | 37  | 5 | (17)                                           |
| 40   | 19.75 | grainyhead         | intra                |                                             | -            | -  | 40  | - | (18)                                           |
| 41   | 19.66 | brinker            | up / 10.8 kb / 2     | 1: up 5.7 kb (CG1659)                       | 43           | -  | 41  | - | (19)                                           |
| 42   | 19.66 | hephaestus         | intra                |                                             | -            | -  | 42  | - | (20)                                           |
| 47   | 19.36 | echinoid           | intra                |                                             | 93           | -  | 47  | - | double hit in File 3A (55+93)                  |
| 48   | 19.33 | ken                | up / -.1 kb / 1      |                                             | 23           | 19 | 48  | - | (21)                                           |
| 52   | 19.05 | Furin 1            | up / 60 kb / 3       |                                             | -            | -  | 52  | - | quadrupel hit, see modules 74, 131, 201        |
| 54   | 18.99 | dachsous           | intra                |                                             | -            | -  | 54  | - | (22)                                           |
| 57   | 18.78 | runt               | up / 17 kb / 3       | 1: up 3.8 kb (CG1338) 2: down 6.7 kb (1835) | 126          | 57 | 57  | - | (8)                                            |
| 58   | 18.70 | Antennapedia       | up / 6.9 kb / 1      |                                             | -            | -  | 58  | - | (23)                                           |
| 63   | 18.65 | tailless           | up / 1.5 kb / 1      |                                             | -            | -  | 63  | - | (1)                                            |
| 68   | 18.44 | Optix              | down / 11 kb / 2     | 1: down 2.2. kb (CG12769)                   | 9            | -  | 68  | - | (24)                                           |
| 74   | 18.27 | Fur1               | up / 21 kb / 1       |                                             | 56           | -  | 74  | - | quadrupel hit, see modules 52, 131, 201        |
| 85   | 17.91 | ushaped            | up / 12.7 kb / 1     |                                             | -            | -  | 85  | - | (25)                                           |
| 86   | 17.91 | paired             | down / 2.5 kb / 1    | 2: up 12.9 kb (CG 5325)                     | -            | -  | 86  | - | (26)                                           |
| 92   | 17.70 | CG14678            | up / 71 kb / 2       | 1: down 2 kb (CG11373)                      | 52           | -  | 92  | - | double hit, see module 151                     |
| 94   | 17.66 | CG1573             | up / 11 kb / 2       | 1: down 3.7 kb (CG1733)                     | -            | -  | 94  | - | double hit, see module 228                     |
| 99   | 17.46 | caudal             | down / 2.3 kb / 1    | 2: up 3.1 kb (CG9324 -small ORF)            | -            | -  | 99  | - | (27)                                           |
| 103  | 17.40 | CG13034            | down / -.7 kb / 1    | 2: up 24.7 kb (CG4541)                      | -            | -  | 103 | - | double hit, see module 187                     |
| 112  | 17.16 | runt               | up / 9.8 kb / 1      |                                             | 91           | 45 | 112 | - | (8)                                            |
| 117  | 17.09 | knirps-like        | intra                |                                             | 37           | -  | 117 | - | (28, 29)                                       |

|     |       |                 |                  |                                                                   |     |    |     |     |                                        |
|-----|-------|-----------------|------------------|-------------------------------------------------------------------|-----|----|-----|-----|----------------------------------------|
| 120 | 17.05 | Abdominal-B     | down / 40 kb / 2 | 1: down 1.6 kb (CG10349) 3: up 57 kb abd-A                        | -   | -  | 120 | -   | (30)                                   |
| 122 | 17.04 | abdominal-A     | up / 17 kb / 1   |                                                                   | 51  | -  | 122 | -   | (31)                                   |
| 131 | 16.95 | Furin1          | up / 43 kb / 3   | 1: up 31 kb (CG5127) 2: down 34 kb (CG4553)                       | -   | -  | 131 | -   | quadruple hit, see modules 52, 74, 201 |
| 136 | 16.89 | knirps          | intra            |                                                                   | -   | -  | 136 | 37  | (2)                                    |
| 137 | 16.88 | CG8965          | up / 11 kb / 3   | 1: down 1.5 kb (CG9024) 2: down 4.3 kb (CG9029)                   | -   | -  | 137 | -   | double hit, see module 198             |
| 151 | 16.75 | CG14678         | up / 30 kb / 1   |                                                                   | -   | -  | 151 | -   | double hit, see module 92              |
| 156 | 16.65 | sloppy paired 2 | up / 3.5 kb / 1  | 2: down 6.1 kb (slp1)                                             | -   | -  | 156 | -   | (32)                                   |
| 167 | 16.57 | runt ?          | down / 38 kb / 4 | 1: up 29 bp (CG1324) 2: down 9 kb (CG15452) 3: down 35 kb (shakB) | -   | -  | 167 | -   | (8)                                    |
| 174 | 16.52 | odd skipped     | up / 4.3 kb / 1  |                                                                   | -   | -  | 174 | -   | (33)                                   |
| 179 | 16.44 | irre C          | up / 144 kb / 2  | 1: up 13 kb (kirre)                                               | -   | -  | 179 | -   | (34)                                   |
| 193 | 16.35 | hairy           | up / 10.5 kb / 1 |                                                                   | 34  | 30 | 193 | 1+4 | (3)                                    |
| 195 | 16.34 | CG5060          | up / 31 kb / 3   | 1: down 12.3 kb (CG15683) 2: down 21 kb (CG17201)                 | 117 | 54 | 195 | -   | double hit in File 3A (117 + 132)      |
| 201 | 16.28 | Furin1          | up / 17 kb / 1   |                                                                   | -   | -  | 201 | -   | quadruple hit, see modules 52, 74, 131 |
| 202 | 16.27 | Hr38            | intra            |                                                                   | -   | -  | 202 | -   | (35)                                   |
| 203 | 16.27 | Goosecoid       | up / 2.5 kb / 1  |                                                                   | -   | -  | 203 | -   | (36)                                   |
| 204 | 16.26 | no ocelli       | down / 29 kb / 2 | 1: down 24 kb (CG4218) 3: up 72 kb (CG15283)                      | -   | -  | 204 | -   | (37)                                   |
| 228 | 16.07 | CG1573          | intra            |                                                                   | -   | -  | 228 | -   | double hit, see module 94              |
| 232 | 16.03 | AlstR           | up / 16 kb / 1   |                                                                   | -   | -  | 232 | -   | double hit, see module 260             |
| 235 | 15.99 | TepIV           | up / 2.5 kb / 2  | 1: up -.4 kb (CG10337)                                            | -   | -  | 235 | -   | double hit, see module 268             |
| 236 | 15.99 | bruno 3         | up / 95 / 2      | 1: down 89 kb (CG8757)                                            | 105 | 48 | 236 | -   | double hit in File 3A (105 + 130)      |
| 260 | 15.84 | AlstR           | up / 16 kb / 1   |                                                                   | -   | -  | 260 | -   | double hit, see module 232             |
| 268 | 15.80 | TepIV           | intra            |                                                                   | -   | -  | 268 | -   | double hit, see module 235             |
| 269 | 15.79 | spalt-m         | up / 31 kb / 3   | 1: up 9.6 kb (sala) 2: down 20 kb (CG6488)                        | -   | -  | 269 | -   | (38)                                   |
| 277 | 15.75 | abdominal-A     | up / 35 kb / 2   | 1: up 15 kb (CG10349)                                             | -   | -  | 277 | 21  | (31)                                   |
| 283 | 15.72 | even skipped    | up / 1.5 kb / 1  |                                                                   | 76  | 42 | 283 | -   | (6, 7)                                 |
| 284 | 15.71 | proboscipedia   | intra            |                                                                   | 124 | -  | 284 | -   | (39)                                   |

## References for File 3C

- Pignoni, F., Baldarelli, R. M., Steingrimsson, E., Diaz, R. J., Patapoutian, A., Merriam, J. R. & Lengyel, J. A. (1990) *Cell* **62**, 151-163.
- Nauber, U., Pankratz, M. J., Kienlin, A., Seifert, E., Klemm, U. & Jackle, H. (1988) *Nature* **336**, 489-492.
- Ingham, P., Howard, K. & Ish-Horowitz, D. (1985) *Nature* **318**, 493-445.
- Gaul, U. & Jackle, H. (1987) *Cell* **51**, 549-555.
- Knipple, D. C., Seifert, E., Rosenberg, U. B., Preiss, A. & Jackle, H. (1985) *Nature* **317**, 40-44.
- Frasch, M. & Levine, M. (1987) *Genes Dev* **1**, 981-995.
- Macdonald, P. M., Ingham, P. & Struhl, G. (1986) *Cell* **47**, 721-734.
- Gergen, J. P. & Butler, B. A. (1988) *Genes Dev* **2**, 1179-1193.
- Russell, S. R., Sanchez-Soriano, N., Wright, C. R. & Ashburner, M. (1996) *Development* **122**, 3669-3676.
- Nambu, P. A. & Nambu, J. R. (1996) *Development* **122**, 3467-3475.
- Berman, B. P., Nibu, Y., Pfeiffer, B. D., Tomancak, P., Celniker, S. E., Levine, M., Rubin, G. M. & Eisen, M. B. (2002) *Proc Natl Acad Sci U S A* **99**, 757-762.
- Francois, V., Solloway, M., O'Neill, J. W., Emery, J. & Bier, E. (1994) *Genes Dev* **8**, 2602-2616.
- Roder, L., Vola, C. & Kerridge, S. (1992) *Development* **115**, 1017-1033.
- Chu, H., Parras, C., White, K. & Jimenez, F. (1998) *Genes Dev* **12**, 3613-3624.
- Baumgartner, S., Martin, D., Hagios, C. & Chiquet-Ehrismann, R. (1994) *Embo J* **13**, 3728-3740.
- Mohler, J., Eldon, E. D. & Pirrotta, V. (1989) *Embo J* **8**, 1539-1548.
- Tautz, D. (1988) *Nature* **332**, 281-284.

18. Huang, J. D., Dubnicoff, T., Liaw, G. J., Bai, Y., Valentine, S. A., Shirokawa, J. M., Lengyel, J. A. & Courey, A. J. (1995) *Genes Dev* **9**, 3177-3189.
19. Ashe, H. L., Mannervik, M. & Levine, M. (2000) *Development* **127**, 3305-3312.
20. Davis, M. B., Sun, W. & Standiford, D. M. (2002) *Mech Dev* **111**, 143-147.
21. Kuhnlein, R. P., Chen, C. K. & Schuh, R. (1998) *Mech Dev* **79**, 161-164.
22. Clark, H. F., Brentrup, D., Schneitz, K., Bieber, A., Goodman, C. & Noll, M. (1995) *Genes Dev* **9**, 1530-1542.
23. Levine, M., Hafén, E., Garber, R. L. & Gehring, W. J. (1983) *Embo J* **2**, 2037-2046.
24. Seo, H. C., Curtiss, J., Mlodzik, M. & Fjose, A. (1999) *Mech Dev* **83**, 127-139.
25. Fossett, N., Zhang, Q., Gajewski, K., Choi, C. Y., Kim, Y. & Schulz, R. A. (2000) *Proc Natl Acad Sci U S A* **97**, 7348-7353.
26. Baumgartner, S. & Noll, M. (1990) *Mech Dev* **33**, 1-18.
27. Macdonald, P. M. & Struhl, G. (1986) *Nature* **324**, 537-545.
28. Oro, A. E., Ong, E. S., Margolis, J. S., Posakony, J. W., McKeown, M. & Evans, R. M. (1988) *Nature* **336**, 493-496.
29. Rothe, M., Nauber, U. & Jackle, H. (1989) *Embo J* **8**, 3087-3094.
30. Celniker, S. E., Keelan, D. J. & Lewis, E. B. (1989) *Genes Dev* **3**, 1424-1436.
31. Karch, F., Bender, W. & Weiffenbach, B. (1990) *Genes Dev* **4**, 1573-1587.
32. Grossniklaus, U., Pearson, R. K. & Gehring, W. J. (1992) *Genes Dev* **6**, 1030-1051.
33. Coulter, D. E., Swaykus, E. A., Beran-Koehn, M. A., Goldberg, D., Wieschaus, E. & Schedl, P. (1990) *Embo J* **9**, 3795-3804.
34. Strunkelnberg, M., Bonengel, B., Moda, L. M., Hertenstein, A., de Couet, H. G., Ramos, R. G. & Fischbach, K. F. (2001) *Development* **128**, 4229-4239.
35. Komonyi, O., Mink, M., Csiha, J. & Maroy, P. (1998) *Arch Insect Biochem Physiol* **38**, 185-192.
36. Goriely, A., Stella, M., Coffinier, C., Kessler, D., Mailhos, C., Dessain, S. & Desplan, C. (1996) *Development* **122**, 1641-1650.
37. Cheah, P. Y., Meng, Y. B., Yang, X., Kimbrell, D., Ashburner, M. & Chia, W. (1994) *Mol Cell Biol* **14**, 1487-1499.
38. Kuhnlein, R. P., Frommer, G., Friedrich, M., Gonzalez-Gaitan, M., Weber, A., Wagner-Bernholz, J. F., Gehring, W. J., Jackle, H. & Schuh, R. (1994) *Embo J* **13**, 168-179.
39. Randazzo, F. M., Cribbs, D. L. & Kaufman, T. C. (1991) *Development* **113**, 257-271.
