# Supplementary material
Source: PubMed Central journal article supplement (PMC139975)
Supplement: 1471-2105-3-30-S4.pdf [file 1471-2105-3-30-S4.pdf]

## File 4: Weight matrices defined by hairy stripes 5, 6, and 7

File 4: Results from running customized Gibbs on hairy stripes 5, 6, and 7. Weight matrices were constructed from uppercase sequence. For each entry, the source of the sequence (for example hairy stripe 5) is given. The last three fields give the weight matrix that matches best (for example Kruppel), if the match is significant. The last two fields are the score and the position of the match counted from the first lowercase base.

>motif 1 (Kruppel like)

|                        |           |     |          |     |    |
|------------------------|-----------|-----|----------|-----|----|
| ncggcCGAAAGAGGAGagggga | h_stripe5 | 5   | Kruppel  | 2.9 | 7  |
| gagagGGAATGAGTTGcctgg  | h_stripe5 | 18  | Kruppel  | 5.4 | 7  |
| gattcGCAAAGAGTTTttacg  | h_stripe5 | 65  | Kruppel  | 6.6 | 7  |
| ctctgGGATAGAGTTTtagagt | h_stripe5 | 200 | Kruppel  | 5.1 | 7  |
| cgcgcCGAAAGAGGTTctctc  | h_stripe5 | 218 | Kruppel  | 5.9 | 7  |
| agagtGGAAGAGTTTctacgg  | h_stripe5 | 269 | Kruppel  | 7.3 | 7  |
| tcttcCGAAAGAGTGTcactc  | h_stripe7 | 282 | Kruppel  | 4.8 | 7  |
| ggcagGGAAGTGTGacatg    | h_stripe7 | 491 | Kruppel  | 5.7 | 7  |
| ttgtgCGAAAGGGTTTcgccc  | h_stripe7 | 564 | Kruppel  | 8.2 | 7  |
| aattcCCAAAAAGTTGcctca  | h_stripe7 | 686 | tailless | 4.1 | 12 |
| ggtcaCGAAAGGGTTGgtgag  | h_stripe7 | 797 | Kruppel  | 8.2 | 7  |
| gaaccCGAAAGAGTTGacacc  | h_stripe6 | 117 | Kruppel  | 7.3 | 7  |

>motif 2 (hunchback/caudal like)

|                         |           |     |           |     |    |
|-------------------------|-----------|-----|-----------|-----|----|
| gccctGCTGTTCTTTTTGgccct | h_stripe7 | 10  | caudal    | 6.0 | 8  |
| ggcccTGTTTTCTTTTTgtggt  | h_stripe7 | 27  | hunchback | 6.0 | 12 |
| attgtTGCAATTTTGTGgtttt  | h_stripe7 | 78  | hunchback | 6.9 | 10 |
| ttaaaTCTTTTTTTTTTttgat  | h_stripe7 | 218 | hunchback | 6.9 | 7  |
| tctagGGGATTTTATTGctttt  | h_stripe7 | 614 | hunchback | 5.6 | 9  |
| ntttgGGAATTTGTTTgagcaa  | h_stripe7 | 674 | tailless  | 4.4 | 9  |
| gttttTGTGTTTTTCTGctttg  | h_stripe7 | 731 | hunchback | 7.4 | 1  |
| cattgTGCGTTTTTGTGcccaa  | h_stripe7 | 855 | hunchback | 7.1 | 8  |
| ggatcGCAGTTTTTACGatcct  | h_stripe6 | 14  | caudal    | 7.2 | 7  |
| ctccgTCCGTTTTTAAAGccttt | h_stripe6 | 53  | caudal    | 9.1 | 7  |
| ngaagTGCAATCTTTATttggc  | h_stripe6 | 241 | hunchback | 3.4 | 12 |
| tgccgGCTGTTTTTAAAGccttt | h_stripe6 | 329 | caudal    | 8.0 | 7  |
| nnnntGCGATTTTTTATGggaac | h_stripe6 | 431 | caudal    | 6.1 | 8  |
| tggtaTCAGTTTTTTTTTtccga | h_stripe6 | 491 | hunchback | 7.7 | 9  |

>motif 3 (knirps like)

|                        |           |    |  |  |  |
|------------------------|-----------|----|--|--|--|
| atggcGTGTCGTA AAAactnt | h_stripe5 | 56 |  |  |  |
|------------------------|-----------|----|--|--|--|

|                        |           |     |         |     |   |
|------------------------|-----------|-----|---------|-----|---|
| ttggtGGATCGTAAAAAtccct | h_stripe5 | 147 | knirps  | 3.8 | 4 |
| agtaaATATCATAAAAgaat   | h_stripe7 | 602 |         |     |   |
| gttgaGGATCGTAAAAaactg  | h_stripe6 | 20  | knirps  | 6.6 | 4 |
| gacggAGGTCGTAAAAcccg   | h_stripe6 | 39  | knirps  | 4.2 | 4 |
| atagcGGGTTGTAAAAAtccgg | h_stripe6 | 140 | Kruppel | 3.8 | 2 |
| acannATGTCCGAAAAAnaaa  | h_stripe6 | 501 | knirps  | 2.7 | 4 |

>motif\_4

|                         |           |     |  |  |  |
|-------------------------|-----------|-----|--|--|--|
| tgcgtGGCGTGGTGGCAtggcg  | h_stripe5 | 40  |  |  |  |
| ttttgGGCCTGTTCAgacct    | h_stripe7 | 97  |  |  |  |
| tcagaGACCTGTTCTGAattta  | h_stripe7 | 109 |  |  |  |
| atctgGACTAGGTAGCAgctgt  | h_stripe7 | 147 |  |  |  |
| attctGGCCAGTTGTCAattagc | h_stripe7 | 370 |  |  |  |
| gccacGGCGATTTGTCAaggct  | h_stripe7 | 404 |  |  |  |
| gccgtGGCTTGGTGACAgatga  | h_stripe7 | 418 |  |  |  |
| cacgtGGCGTGGTATCAgtttt  | h_stripe6 | 482 |  |  |  |
| tttccGACATGTTGTGAactta  | h_stripe6 | 507 |  |  |  |

>motif 5

|                       |           |     |  |  |  |
|-----------------------|-----------|-----|--|--|--|
| gtnntTTTTGGCCCTGtttn  | h_stripe7 | 18  |  |  |  |
| tntttTTTGTGGTTAGaagtg | h_stripe7 | 37  |  |  |  |
| tgtggTTTTGGGCTGttcag  | h_stripe7 | 92  |  |  |  |
| actggTTTCGGCCCTAaattc | h_stripe7 | 124 |  |  |  |
| gaccgATTCTGGCCAGttgtc | h_stripe7 | 376 |  |  |  |
| gcattTTTCGGCTTAAgtaga | h_stripe7 | 652 |  |  |  |
| tgtnnTTTCTGCTTTGttaa  | h_stripe7 | 726 |  |  |  |
| cgtnnTTTGTGCCCAAcgatc | h_stripe7 | 850 |  |  |  |
| aagncTTTCTGCTCTGccatc | h_stripe6 | 68  |  |  |  |
| taaagTTTTTGACCAGattcc | h_stripe6 | 170 |  |  |  |
| cacatTTTTTGATTAGgcaaa | h_stripe6 | 310 |  |  |  |

>motif 6

|                        |           |     |  |  |  |
|------------------------|-----------|-----|--|--|--|
| ttttaTTAAATCTTTTntttt  | h_stripe7 | 213 |  |  |  |
| aatctTTTAATCTTGAtagaa  | h_stripe7 | 240 |  |  |  |
| ctggtTTTAGTATTTTtcttc  | h_stripe7 | 266 |  |  |  |
| ttgccTTTACCTTTTcgact   | h_stripe7 | 329 |  |  |  |
| ccaccTTTAGCCTTGAcAAat  | h_stripe7 | 396 |  |  |  |
| tccagTTTAACATTTTaatg   | h_stripe7 | 582 |  |  |  |
| taaaaATTAGTCTTGctttgc  | h_stripe7 | 709 |  |  |  |
| gtnntTTAAGCCTTTTctgctc | h_stripe6 | 61  |  |  |  |
| gtnntTTAAGCCTTTTgccta  | h_stripe6 | 323 |  |  |  |
| cccttTTTTGTCTTGTtccca  | h_stripe6 | 447 |  |  |  |
