# Supplementary material
Source: PubMed Central journal article supplement (PMC139975)
Supplement: 1471-2105-3-30-S5.pdf [file 1471-2105-3-30-S5.pdf]

**File 5:** 63 modules predicted by **Ahab** using **Gibbs-generated weight matrices** derived from hairy modules 5, 6 and 7 were examined for the presence of neighboring genes with blastoderm expression based on the BDGP/Celera genome annotation (Release 2) and the existing literature. The four genes closest to the module were examined, and the position of the module relative to the patterned gene is noted, including whether other genes are more proximal (up = upstream, down = downstream, intra = intragenic, 1 = closest gene, 2 = 2<sup>nd</sup> closest gene etc). The list also includes genes/regions that were hit more than once. The columns give the rank and score of each module, and indicate whether the module was recovered with any of the other methods (File 3A = Ahab 146, File 3B = Ahab – Tll, File 3C = Ahab window 700, File 5 = Gibbs on hairy + Ahab). Modules whose annotated binding sites were used to construct weight matrices via the customized Gibbs algorithm are marked by a star.

| Rank | Score | Gene              | Genomic organization | Comments                                       | Rank in File |    |     |    | References                |
|------|-------|-------------------|----------------------|------------------------------------------------|--------------|----|-----|----|---------------------------|
|      |       |                   |                      |                                                | 3A           | 3B | 3C  | 5  |                           |
| 1 *  | 42.16 | hairy             | up / 10.9 kb / 1     |                                                | 34           | 30 | 193 | 1  | (1)                       |
| 2 *  | 36.43 | hairy             | up / 9.2 kb / 1      |                                                | 1            | 1  | 3   | 2  | (1)                       |
| 3 *  | 31.43 | hairy             | up / 6.2 kb / 1      |                                                | 41           | 49 | -   | 3  | (1)                       |
| 4 *  | 25.08 | hairy             | up / 10.4 kb / 1     |                                                | 34           | 30 | 193 | 4  | (1)                       |
| 5    | 22.58 | hunchback         | up / 3.3 kb / 1      |                                                | 129          | -  | 37  | 5  | (2)                       |
| 7    | 21.91 | abdominal-A       | up / 83.2 kb / 4     | 1: down 15.4 kb (Abd-B)                        | -            | -  | -   | 7  | (3)                       |
| 8    | 20.02 | homothorax        | intra                |                                                | -            | -  | -   | 8  | (4)                       |
| 9    | 19.41 | bxd/Ultrabithorax | up / 18.8 kb / 2     | 1: up 17.5 kb (Glut3)                          | -            | -  | -   | 9  | (5, 6)                    |
| 10   | 18.55 | frizzled 2        | up / 37.9 kb / 1     |                                                | -            | -  | -   | 10 | (7)                       |
| 11   | 18.55 | CG6559            | up / 30 kb / 1       |                                                | -            | -  | -   | 11 | double hit, see module 44 |
| 16   | 17.76 | hairy             | up / 18.9 kb / 3     | 1: down 6.4 kb (CG6486)<br>2: up 8.1 kb (Arr2) | -            | -  | -   | 16 | (1)                       |
| 17   | 17.73 | abdominal-A       | up / -.2 kb / 1      |                                                | -            | -  | -   | 17 | (3)                       |
| 21   | 17.43 | abdominal-A       | up / 35.8 kb / 2     | 1: up 14.8 kb (anon)                           | -            | -  | 277 | 21 | (3)                       |
| 24   | 16.69 | fd64A             | up / 1.4 kb / 1      |                                                | -            | -  | -   | 24 | (8)                       |
| 25   | 16.55 | nubbin            | up / 2.6 kb / 1      |                                                | -            | -  | -   | 25 | (9, 10)                   |
| 31   | 16.10 | empty spiracles   | down / 2.2 kb / 1    | 2: up 16.6 (CG13897)                           | -            | -  | -   | 31 | (11)                      |
| 37   | 15.90 | knirps            | intra                |                                                | -            | -  | 136 | 37 | (12)                      |
| 39   | 15.72 | CG6559            | up / 45 kb / 1       |                                                | -            | -  | -   | 39 | double hit, see module 12 |
| 46   | 15.90 | Btk29A            | intra                |                                                | -            | -  | -   | 46 | (13, 14)                  |

## References for File 5

- Ingham, P., Howard, K. & Ish-Horowicz, D. (1985) *Nature* **318**, 493-445.
- Tautz, D. (1988) *Nature* **332**, 281-284.
- Karch, F., Bender, W. & Weiffenbach, B. (1990) *Genes Dev* **4**, 1573-1587.
- Rieckhof, G. E., Casares, F., Ryoo, H. D., Abu-Shaar, M. & Mann, R. S. (1997) *Cell* **91**, 171-183.
- Beachy, P. A., Helfand, S. L. & Hogness, D. S. (1985) *Nature* **313**, 545-551.
- Lipshitz, H. D., Peattie, D. A. & Hogness, D. S. (1987) *Genes Dev* **1**, 307-322.
- Bhanot, P., Brink, M., Samos, C. H., Hsieh, J. C., Wang, Y., Macke, J. P., Andrew, D., Nathans, J. & Nusse, R. (1996) *Nature* **382**, 225-230.
- Hacker, U., Grossniklaus, U., Gehring, W. J. & Jackle, H. (1992) *Proc Natl Acad Sci U S A* **89**, 8754-8758.
- Lloyd, A. & Sakonju, S. (1991) *Mech Dev* **36**, 87-102.
- Dick, T., Yang, X. H., Yeo, S. L. & Chia, W. (1991) *Proc Natl Acad Sci U S A* **88**, 7645-7649.
- Cubas, P., Modolell, J. & Ruiz-Gomez, M. (1994) *Development* **120**, 2555-2566.
- Nauber, U., Pankratz, M. J., Kienlin, A., Seifert, E., Klemm, U. & Jackle, H. (1988) *Nature* **336**, 489-492.
- Roulier, E. M., Panzer, S. & Beckendorf, S. K. (1998) *Mol Cell* **1**, 819-829.
- Vincent, W. S., 3rd, Gregory, R. J. & Wadsworth, S. C. (1989) *Genes Dev* **3**, 334-347.
